# Supplementary material for: Chromatographic selectivity of graphene capillary column pretreated with bio-inspired polydopamine polymer
Source: Royal Society of Chemistry journal article supplement (doi:10.1039/c5ra14111g), 2015-01-01
Supplement: c5ra14111g1.pdf [file c5ra14111g1.pdf]

## Supporting Information

### **Chromatographic selectivity of graphene capillary column pretreated with bio-inspired polydopamine polymer**

Na Han, Meiling Qi\*, Minghui Ye, Ruonong Fu and Liangti Qu\*

*Key Laboratory of Cluster Science, Ministry of Education of China, Beijing Key Laboratory of Photoelectronic/Electrophotonic Conversion Materials and School of Chemistry, Beijing Institute of Technology, Beijing, 100081, China.*

*E-mails: mlqi@bit.edu.cn; lqu@bit.edu.cn*

#### **Table of Contents**

**Fig. S1** TGA curve of graphene stationary phase using Shimadzu TGA-50H Thermoanalyzer.

**Fig. S2** SEM image of PDA coating on the inner wall of a capillary GC column with a magnification of 1000 ×.

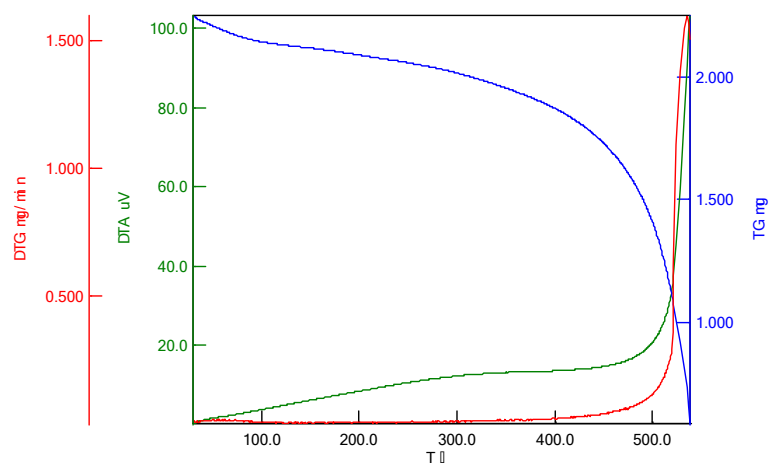

**Fig. S1** TGA curve of graphene stationary phase using Shimadzu TGA-50H Thermoanalyzer.

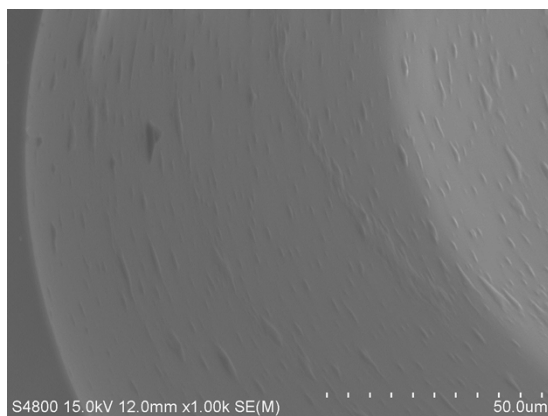

**Fig. S2** SEM image of PDA coating on the inner wall of a capillary GC column with a magnification of 1000 ×.
